# Supplementary material for: Effectiveness and costs of non-invasive foetal RHD genotyping in rhesus-D negative mothers: a French multicentric two-arm study of 850 women
Source: Springer Nature journal article supplement (doi:10.1186/s12884-018-2114-5), 2018-12-01
Supplement: MOESM1 [file 16343514]

**Table Unit Costs and Data Sources**

| Description                                                                                                             | Unit cost € | Source of unit cost                                                                                                           |
|-------------------------------------------------------------------------------------------------------------------------|-------------|-------------------------------------------------------------------------------------------------------------------------------|
| <b>Biological tests</b> - Quantity and date of tests recorded in the CRF <sup>1</sup>                                   |             |                                                                                                                               |
| Genotyping                                                                                                              | 140,09      | Micro-costing observations (all production costs included)                                                                    |
| Indirect Coombs - qualitative                                                                                           | 10,08       | Tarif NABM <sup>2</sup> <a href="http://www.codage.ext.cnamts.fr/codif/nabm/">http://www.codage.ext.cnamts.fr/codif/nabm/</a> |
| Indirect Coombs - quantitative                                                                                          | 55,35       |                                                                                                                               |
| Kleihauer-Betke                                                                                                         | 18,90       |                                                                                                                               |
| Phenotyping test                                                                                                        | 20,25       |                                                                                                                               |
| <b>Anti-D immunoglobulin injections</b> - Dose recorded in the CRF <sup>1</sup>                                         |             |                                                                                                                               |
| Rhophylac 200 µl                                                                                                        | 60,89       | Pharmacy sales prices                                                                                                         |
| Rhophylac 300 µl                                                                                                        | 84,62       |                                                                                                                               |
| <b>Consultations</b> - Practitioner and type of visit recorded in the CRF <sup>1</sup>                                  |             |                                                                                                                               |
| Nurse (blood sample)                                                                                                    | 4,73        | Tariff NGAP <sup>3</sup><br><a href="http://www.ameli.fr/">http://www.ameli.fr/</a>                                           |
| Nurse (injection)                                                                                                       | 6,30        |                                                                                                                               |
| Doctor                                                                                                                  | 28,00       |                                                                                                                               |
| Midwife                                                                                                                 | 23,00       |                                                                                                                               |
| <b>Hospital costs</b> - Length of stays, parity, type & clinical detail recorded in event database and CRF <sup>1</sup> |             |                                                                                                                               |
| During pregnancy                                                                                                        | Variable    | DRG <sup>4</sup> tariff<br><a href="http://www.atih.sante.fr/">http://www.atih.sante.fr/</a>                                  |
| Delivery                                                                                                                | DRG tariffs |                                                                                                                               |

<sup>1</sup> CRF Case Report Form

<sup>2</sup> NABM National Biology Database (Nomenclature des Actes de Biologie Médicale)

<sup>3</sup> NGAP Professionnal Medical Acts Database (Nomenclature générale des actes professionnels)

<sup>4</sup> DRG Diagnosis Related Groups
